# Supplementary material for: Proteoglycan 4 Modulates Osteogenic Smooth Muscle Cell Differentiation during Vascular Remodeling and Intimal Calcification
Source: MDPI journal article supplement (doi:10.3390/cells10061276), 2021-05-21
Supplement: s1 [file s1]

## Supplemental Material

# Proteoglycan 4 modulates osteogenic smooth muscle cell differentiation during vascular remodeling and intimal calcification

Till Seime<sup>1</sup>, Asim C. Akbulut<sup>2</sup>, Moritz Lindquist Liljeqvist<sup>1</sup>, Antti Siika<sup>1</sup>, Hong Jin<sup>1,3</sup>, Greg Winski<sup>3</sup>, Rick H. van Gorp<sup>2</sup>, Eva Karlöf<sup>1</sup>, Mariette Lengquist<sup>1</sup>, Andrew J. Buckler<sup>1</sup>, Malin Kronqvist<sup>1</sup>, Olivia J. Waring<sup>4</sup>, Jan H.N. Lindeman<sup>5</sup>, Erik Biessen<sup>4</sup>, Lars Maegdefessel<sup>3,6</sup>, Anton Razuvaev<sup>1</sup>, Leon J. Schurgers<sup>2,7</sup>, Ulf Hedin<sup>1\*</sup>, Ljubica Matic<sup>1\*,#</sup> (\*equal contribution)

## Supplementary Figures and Legends

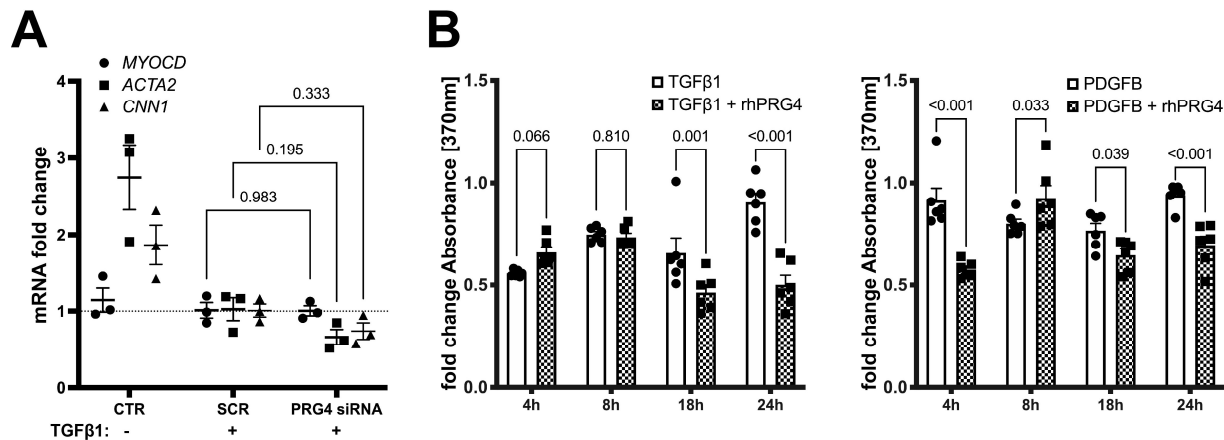

**Figure S1.** PRG4 knockdown affects expression of SMC contractile markers and addition of PRG4 protein reduces SMC proliferation under TGFβ1 and PDGFB stimulation. **(A)** SiRNA knockdown of *PRG4* downregulated expression of *ACTA2* and *CNN1* in HAoSMCs, however this effect remained non-significant compared to scrambled control. **(B)** RhPRG4 significantly inhibited SMC proliferation under TGFβ1 and PDGFB stimulation. HAoSMCs-human aortic smooth muscle cells. CTR-untreated cells in identical medium and FBS conditions; SCR-scrambled control following TGFβ1; rhPRG4-recombinant human PRG4. Plots show mean with SEM. Statistical difference assessed by 2-way ANOVA, **(A)**  $n = 3$ , **(B)**  $n = 6$  experimental replicates.

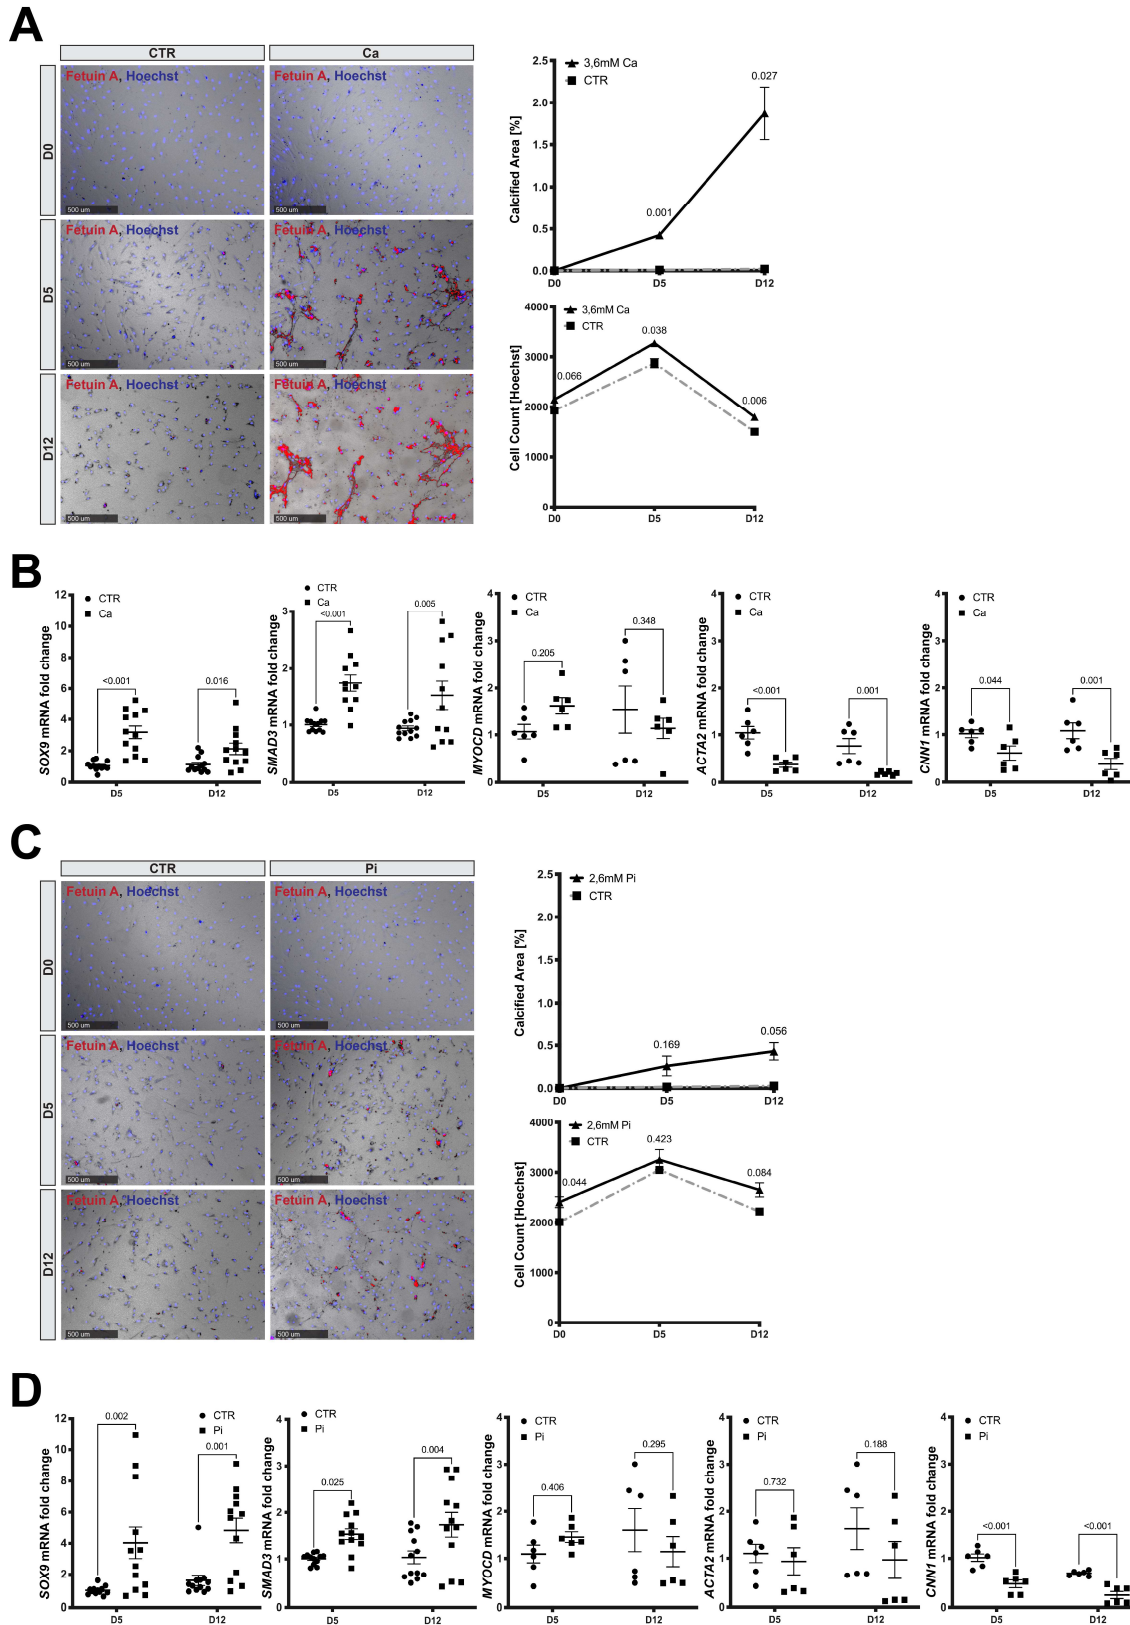

**Figure S2.** Validation of calcification induction in vitro by high calcium and phosphate levels. (A) Stimulation of HA-OSMCs cells with 3.6 mM calcium resulted in extensive sheet-like calcification visualized by an Alexa-fluor 546 coupled Fetuin-A probe. Calcification area (% of total area) was significantly increased already after 5 days (about 50% compared to baseline), while cell numbers assessed by HOECHST stain also increased but only by about 10%. The extent of calcification was up to about 200% after 12 days, while cell numbers stayed roughly unchanged. (B) Calcium treatment

significantly elevated levels of *SOX9* and *SMAD3* mRNA and caused a downregulation of typical markers of SMC quiescence and contractility (*MYOCD*, *ACTA2*, *CNN1*). (C) Exposure to 2.6 mM phosphate resulted in nodular calcifications. Calcification area was significantly increased after 12 days, not affecting cell numbers compared to controls. (D) High phosphate stimulation increased *SOX9* and *SMAD3* mRNA expression and caused a downregulation of *MYOCD*, *ACTA2* and *CNN1*, however not as severe as under high calcium conditions. Images show 4x magnification. CTR-untreated cells in identical medium and FBS conditions; HAoSMCs-human aortic smooth muscle cells. Plots show mean with SEM. Statistical difference assessed by 2-way ANOVA, (A, C)  $n = 3$ , (B, D)  $n = 3$  experimental replicates in cells from 3 patients and commercial cells from Lonza.

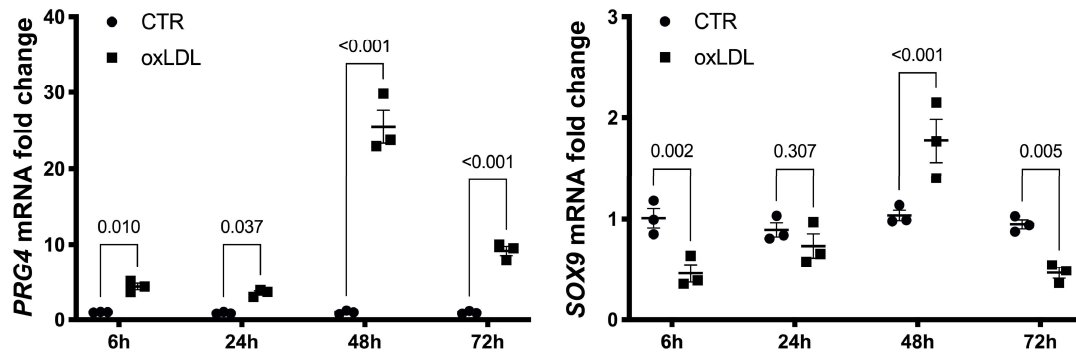

**Figure S3.** OxLDL loading induces *PRG4* and *SOX9* expression *in vitro*. Loading with 20  $\mu\text{g/ml}$  oxLDL significantly induced *PRG4* in HAoSMCs, especially after 48h. At this time point *PRG4* expression coincided with increased *SOX9* mRNA levels. Plots show mean with SEM. Statistical difference assessed by 2-way ANOVA,  $n = 3$  experimental replicates.

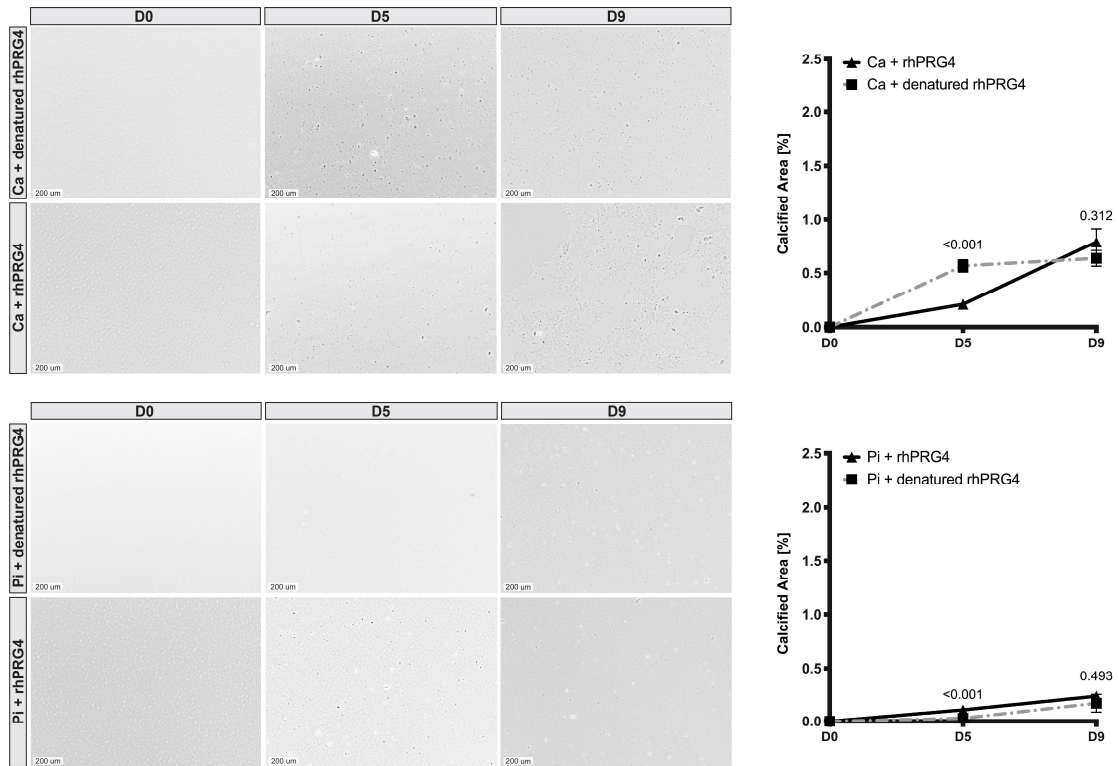

**Figure S4.** No significant passive calcification caused by exposure to rhPRG4 protein in the absence of SMCs. In the absence of cells rhPRG4 only caused minor passive precipitations below 1% of total area both in combination with high calcium or phosphate conditions. This effect showed no significant difference to the passive effect of heat inactivated rhPRG4. Images show 10x magnification. rhPRG4-recombinant human PRG4 protein. Plots show mean with SEM. Statistical difference assessed by 2-way ANOVA,  $n = 3$  experimental replicates.

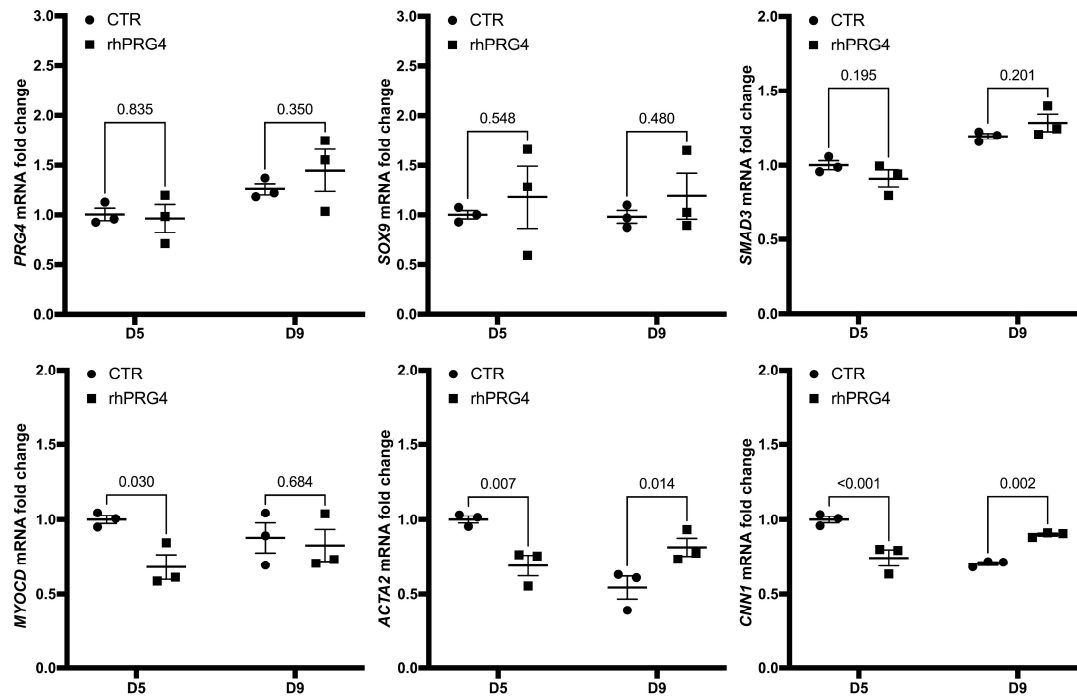

**Figure 5.** RhPRG4 protein stabilizes expression of contractile SMC markers. Without calcifying conditions, rhPRG4 supplementation had no significant effect on *PRG4*, *SOX9* or *SMAD3* mRNA expression of HAoSMCs. However, after an initial downregulation, typical markers of SMC quiescence and contractility stabilized and remained significantly higher compared to controls after 9 days. Images show 4x magnification. CTR-untreated cells in identical medium and FBS conditions; HAoSMCs-human aortic smooth muscle cells. Plots show mean with SEM. Statistical difference assessed by 2-way ANOVA,  $n = 3$ .

**Table S1.** PRG4 plaque mRNA expression is independently correlated to calcification volume. Multiple linear regression analysis of PRG4 mRNA expression with calcification volume (CalcVolProp), lipid rich necrotic core volume (LRNCVolProp) and plaque burden volume (PlaqueBurdenVolRatio) in late-stage human atherosclerotic plaques.

| Variable             | Estimate | 95% CI (asymptotic) | P value |
|----------------------|----------|---------------------|---------|
| Intercept            | 3.74     | −0.94 to 8.41       | 0.11    |
| CALCVolProp [%]      | 0.07     | 0.003 to 0.13       | 0.04    |
| LRNCVolProp [%]      | 0.005    | −0.07 to 0.084      | 0.90    |
| PlaqueBurdenVolRatio | 5.10     | −3.80 to 14.00      | 0.25    |
| R squared=0.35       |          |                     |         |

### Major Resources Table.

Animals (in vivo studies).

| Species                  | Vendor or Source      | Background Strain | Sex  |
|--------------------------|-----------------------|-------------------|------|
| ApoE <sup>-/-</sup> mice | Taconic Biosciences   | C57BL/6           | male |
| ApoE <sup>-/-</sup> mice | Maastricht University | C57BL6/J          | male |
| Sprague-Dawley rats      | Charles Rivers        | SD                | male |

Antibodies.

| Target antigen | Vendor or Source | Catalog # | Working concentration |
|----------------|------------------|-----------|-----------------------|
| PRG4           | Sigma            | HPA028523 | 1:25 - 1:50           |
| SMA            | DAKO             | M0851     | 1:1500                |
| CD68           | DAKO             | M0876     | 1:100                 |
| TRAP           | LS BIO           | LS-C87845 | 1:50                  |
| SOX9           | Sigma            | AMAB90795 | 1:200                 |
| SOX9           | Abcam            | Ab26414   | 1:500                 |
| RUNX2          | Sigma            | AMAB90591 | 1:200                 |
| VWF            | DAKO             | M0616     | 1:500                 |

Cultured Cells.

| Name                                       | Vendor or Source | Catalog # | Sex (F, M, or unknown) |
|--------------------------------------------|------------------|-----------|------------------------|
| human carotid smooth muscle cells          | Cell Aplications | 3514-05A  | unknown                |
| human ascending aortic smooth muscle cells | Lonza            | CC-2571   | M                      |

Data & Code Availability.

| Description             | Source / Repository     | Persistent ID / URL |
|-------------------------|-------------------------|---------------------|
| BiKE microarray dataset | Gene Expression Omnibus | GSE21545            |

Other.

| Description        | Vendor or Source | Catalog #     |
|--------------------|------------------|---------------|
| siRNA PRG4         | Thermo Fisher    | #s19926       |
| siRNA SOX9         | Thermo Fisher    | #s532695      |
| siRNA SMAD3        | Thermo Fisher    | #s8401        |
| Taqman assay PRG4  | Thermo Fisher    | Hs00981633_m1 |
| Taqman assay SOX9  | Thermo Fisher    | Hs00165814_m1 |
| Taqman assay BMP2  | Thermo Fisher    | Hs00154192_m1 |
| Taqman assay MYOCD | Thermo Fisher    | Hs00538076_m1 |
| Taqman assay ACTA2 | Thermo Fisher    | Hs00426835_g1 |
| Taqman assay MYH11 | Thermo Fisher    | Hs00975796_m1 |
| Taqman assay CNN1  | Thermo Fisher    | Hs00959434_m1 |
| PDGFB              | Gibco            | #PHG0044      |
| TGFβ1              | Sigma            | #T7039        |
| IFNγ               | R&D Systems      | #285-IF-100   |
| IGF1               | Sigma            | #I3769        |
| IGF2               | Sigma            | #I2526        |
